# Supplementary material for: Automated and Rapid Easy-to-Use Magnetic Solid-Phase Extraction System for Five Heavy Metals in Cereals and Feeds
Source: MDPI journal article supplement (doi:10.3390/foods11243944), 2022-12-07
Supplement: s1 [file s1]

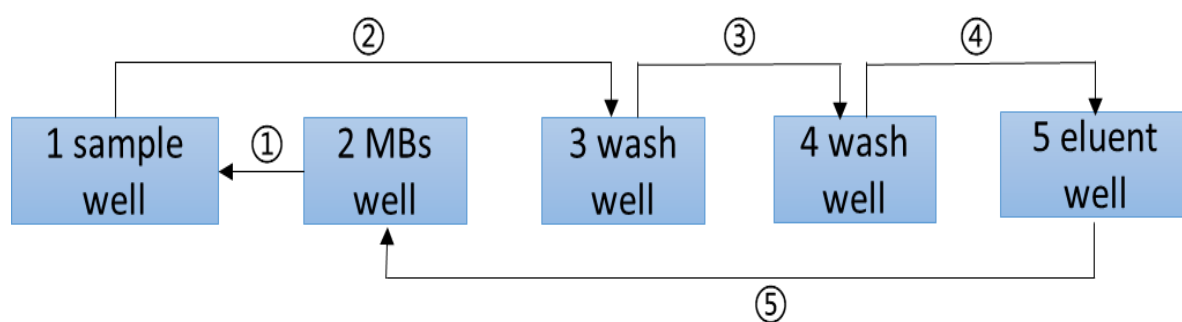

**Figure S1.** Routing of the automatic pretreatment system based on MSPE.

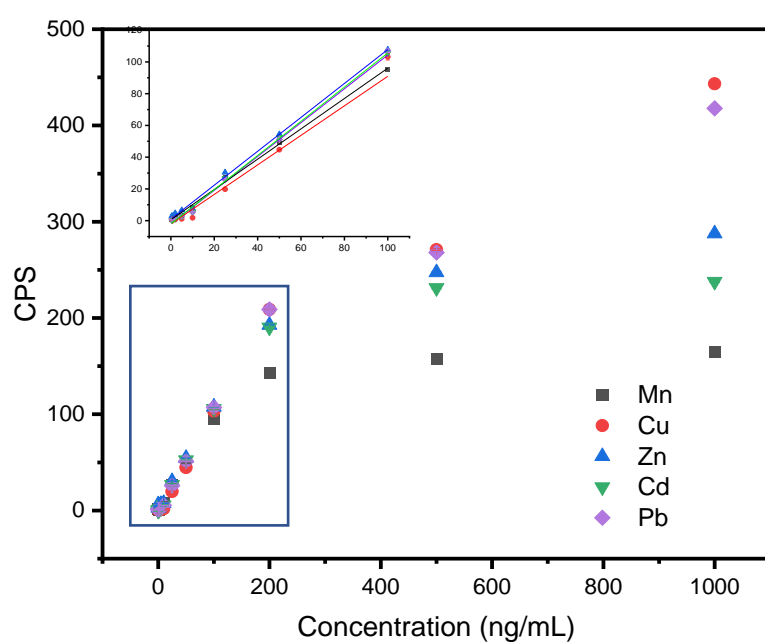

**Figure S2.** The standard curves of Mn, Cu, Zn, Cd and Pb.

**Table S1.** The sequence time for each step of the automatic pretreatment system.

| Step | Sequence   | Well | Mixing Time<br>(min) | Transfer Time<br>(min) | Mixing Frequency<br>(Hz) |
|------|------------|------|----------------------|------------------------|--------------------------|
| 1    | Absorption | 1    | 8                    | 2                      | 7.5                      |
| 2    | Wash 1     | 3    | 1                    | 1.5                    | 6.5                      |
| 3    | Wash 2     | 4    | 1                    | 1.5                    | 6.5                      |
| 4    | Elution    | 5    | 3                    | 0.5                    | 7.5                      |
| 5    | Collection | 2    | 0.5                  | 0.5                    | 6.5                      |

**Table S2.** The precision of the proposed method.

| Metal | Measurement Value (mg. kg <sup>-1</sup> ) |       |       |       |       | Average Value           | RSD  |
|-------|-------------------------------------------|-------|-------|-------|-------|-------------------------|------|
|       | (n = 5)                                   |       |       |       |       | (mg. kg <sup>-1</sup> ) | (%)  |
| Mn    | 2.411                                     | 2.581 | 2.510 | 2.438 | 2.536 | 2.495                   | 2.81 |
| Cu    | 2.947                                     | 2.871 | 2.852 | 2.881 | 2.932 | 2.897                   | 1.41 |
| Zn    | 1.943                                     | 2.039 | 2.074 | 1.945 | 2.011 | 2.002                   | 2.89 |
| Cd    | 0.230                                     | 0.223 | 0.218 | 0.219 | 0.213 | 0.221                   | 2.88 |
| Pb    | 0.208                                     | 0.197 | 0.195 | 0.202 | 0.197 | 0.199                   | 2.91 |
